# Supplementary material for: Downregulation of myostatin pathway in neuromuscular diseases may explain challenges of anti-myostatin therapeutic approaches
Source: PubMed Central journal article supplement (PMC5709430; doi:10.1038/s41467-017-01486-4), 2017-11-30
Supplement: 41467_2017_1486_MOESM1_ESM.pdf [file 41467_2017_1486_MOESM1_ESM.pdf]

**Supplementary table 1** : Characteristics of LGMD's biopsies

|                             | <b>LGMD2A<br/>(n=1)</b> | <b>LGMD2B<br/>(n=4)</b> | <b>LGMD2C<br/>(n=2)</b> | <b>LGMD2D<br/>(n=2)</b> | <b>LGMD2L<br/>(n=2)</b> |
|-----------------------------|-------------------------|-------------------------|-------------------------|-------------------------|-------------------------|
| <b>Age (years)</b>          |                         |                         |                         |                         |                         |
| Mean                        | 44,0                    | 34,9                    | 11,2                    | 16,0                    | 39,6                    |
| Range                       | -                       | 24,2 - 50,1             | 8,6 - 13,8              | 12,1 - 20,0             | 21,3 - 57,9             |
| <b>Gender</b>               |                         |                         |                         |                         |                         |
| Female                      | -                       | 3                       | 1                       | 1                       | -                       |
| Male                        | 1                       | 1                       | 1                       | 1                       | 2                       |
| <b>Age of onset (years)</b> |                         |                         |                         |                         |                         |
| Mean                        | 40,0                    | 30,0                    | 4,5                     | 8,0                     | 55,0                    |
| Range                       | -                       | 25 - 35                 | 4 - 5                   | 6 - 10                  | -                       |

**Supplementary table 2: Oligonucleotides used in this study**

| Gene symbol      | Accession n°      | Name         | 5'                      | 3' | Amplicon length |
|------------------|-------------------|--------------|-------------------------|----|-----------------|
| <i>Actb</i>      | NM_007393.5       | b-actin_F    | CTGGCTCCTAGCACCATGAA    |    | 123             |
|                  |                   | b-actin_R    | CTGCTTGCTGATCCACATCT    |    |                 |
| <i>Activin A</i> | NM_008380.2       | Activin A -F | CACACTTCTGCACGCTCCAC    |    | 92              |
|                  |                   | Activin A -R | TTTGCCGAGTCAGGCACAG     |    |                 |
| <i>Tubb5</i>     | NM_011655.5       | b-tubulin_F  | CCTTCATTGGAAACAGCACA    |    | 222             |
|                  |                   | b-tubulin_R  | CCTCCTCTCCGAAATCCTCT    |    |                 |
| <i>Gapdh</i>     | NM_001289726.1    | Gapdh_F      | TTGTGATGGGTGTGAACCAC    |    | 283             |
|                  |                   | Gapdh_R      | TTCAGCTCTGGGATGACCTT    |    |                 |
| <i>Gdf11</i>     | NM_010272         | Gdf11 - F    | ATCAGCCGGGAGGTAGTGAA    |    | 159             |
|                  |                   | Gdf11 - R    | CTGGGCCATGCTTATGACCGT   |    |                 |
| <i>Hprt</i>      | NM_013556.2       | Hprt1_F      | GCAAACCTTTGCTTTCCCTGG   |    | 85              |
|                  |                   | Hprt1_R      | ACTTCGAGAGGTCCTTTTCACC  |    |                 |
| <i>Rplp0</i>     | NM_007475.5       | P0_F         | CTCCAAGCAGATGCAGCAGA    |    | 87              |
|                  |                   | P0_R         | ATAGCCTTGCGCATCATGG     |    |                 |
| <i>Acvr2b</i>    | NM_007397.3       | ActrIIB_F    | GCTCAGCTCATGAACGACT     |    | 68              |
|                  |                   | ActrIIB_R    | CTCTGCCACGACTGCTTGT     |    |                 |
| <i>Fst</i>       | NM_001301373.1    | Fstn_F       | CTCTCAAGTGGATGATTTTC    |    | 345             |
|                  |                   | Fstn_R       | ACAGTAGGCATTATTGGTCTG   |    |                 |
| <i>Mstn</i>      | NM_010834.3       | Mstn_F       | GCACTGGTATTTGGCAGAGTA   |    | 345             |
|                  |                   | Mstn_R       | CACACTCTCCTGAGCAGTAAT   |    |                 |
| <i>ACTIVIN A</i> | ENST00000242208.4 | F-ACTIVIN A  | TTATGGAGCAGACCTCGGAG    |    | 75              |
|                  |                   | R-ACTIVIN A  | AAATCTCGAAGTGCAGCGTC    |    |                 |
| <i>B2M</i>       | NM_004048         | F_B2M        | CTCTCTTTCTGGCCTGGAGG    |    | 67              |
|                  |                   | R_B2M        | TGCTGGATGACGTGAGTAAACC  |    |                 |
| <i>GAPDH</i>     | ENST00000229239   | F-GAPDH2     | AAGGTGAAGGTCCGAGTCAACGG |    | 199             |
|                  |                   | R-GAPDH2     | TGACAAGCTTCCCGTTCTCAGCC |    |                 |
| <i>GUS</i>       | ENST00000304895   | F-GUS        | CTCATTTGGAATTTTGCCGATT  |    | 81              |
|                  |                   | R-GUS        | CCGAGTGAAGATCCCCTTTTA   |    |                 |
| <i>RPLP0</i>     | ENSG00000089157   | F-P0         | TCCAGGCTTTAGGTATCACCAC  |    | 94              |
|                  |                   | R-P0         | GCTCCCACTTTGTCTCCAGTC   |    |                 |
| <i>PPIA</i>      | ENST00000355968   | F-PPIA       | CCTAAAGCATAACGGGTCCTG   |    | 133             |
|                  |                   | R-PPIA       | TTTCACTTTGCCAAACACCA    |    |                 |
| <i>ACVR2B</i>    | ENST00000352511   | F52-AcvRIIb  | CTCCTCTGGGGATCGCTGT     |    | 84              |
|                  |                   | R135-AcvRIIb | CTCCAGTTGGCGTTGTAGT     |    |                 |
| <i>FSTL</i>      | ENST00000256759   | F1-FSTL      | CGGCTGAGCACCTCGTG       |    | 155             |
|                  |                   | R1-FSTL      | TTCTTGTTTCATTCGGCATT    |    |                 |
| <i>GDF11</i>     | ENST00000257868.9 | F-GDF11      | ATTGGCAGAGCATCGACTTC    |    | 182             |
|                  |                   | R-GDF11      | TTTTGTGTTCTCTAGGACTCG   |    |                 |
| <i>MSTN</i>      | NM_005259         | F-972        | TTTTACCCAAAGCTCCTCCA    |    | 258             |
|                  |                   | R-3017       | GAGTCTCGACGGGTCTCAAA    |    |                 |
| <i>MYL1</i>      | ENST00000352451   | F-MYL1       | GCAATGAAGAGCTGAATGCCA   |    | 126             |
|                  |                   | R-MYL1       | TGCAAAAGACACGCAGACCCT   |    |                 |

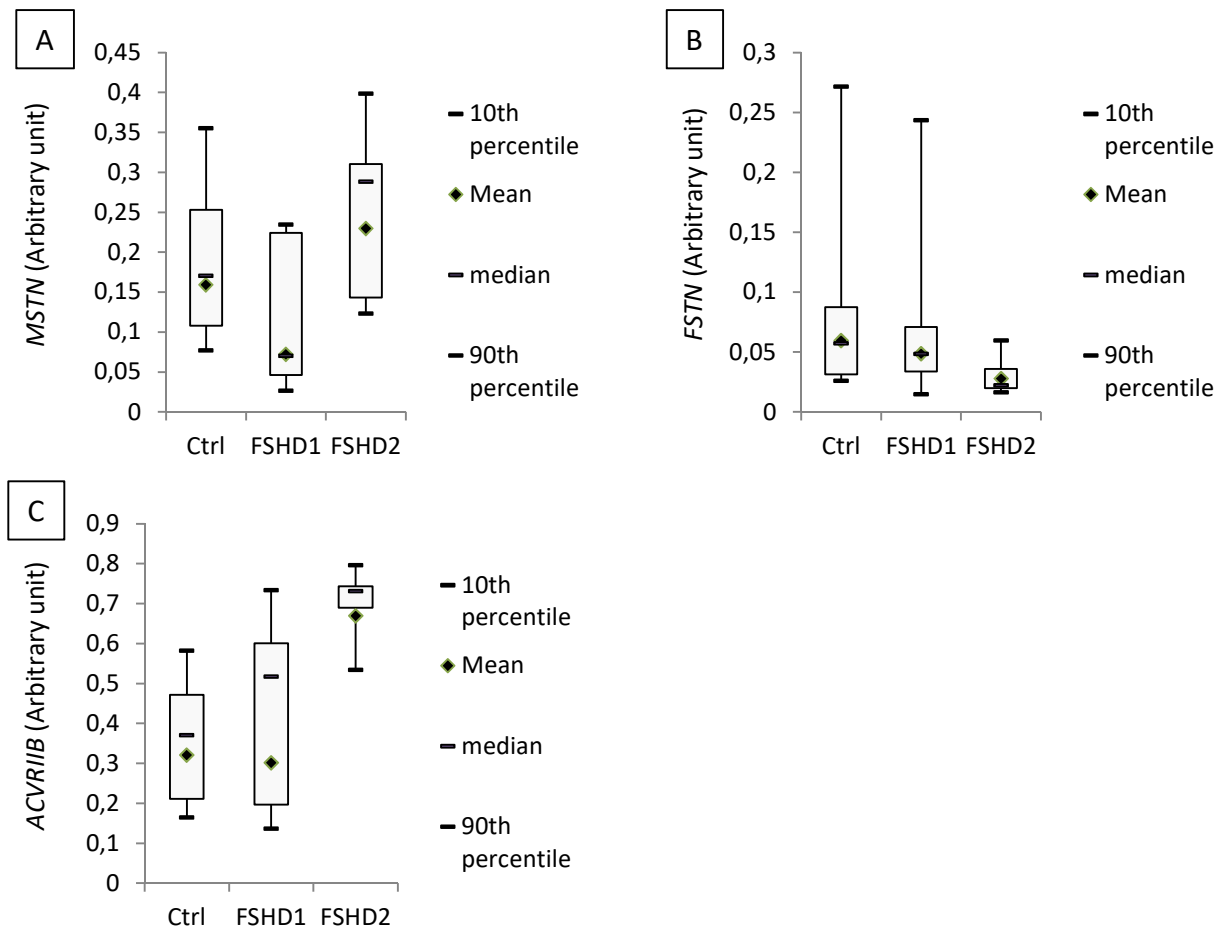

**Supplementary figure 1:** mRNA levels of either *MSTN* (A), *FSTN* (B), or *ACVR1B* (C) were measured by RT-qPCR in healthy controls (Ctrl, N=9), FSHD1 (N=8), FSHD2 (N=5) patients. Horizontal lines are medians, the extremities of the boxes are delimited by the first and third quartile, and the whiskers correspond to the 10th and 90th percentile. A one-way ANOVA, followed by the Fisher's Least Significant Difference multiple comparison test was performed.

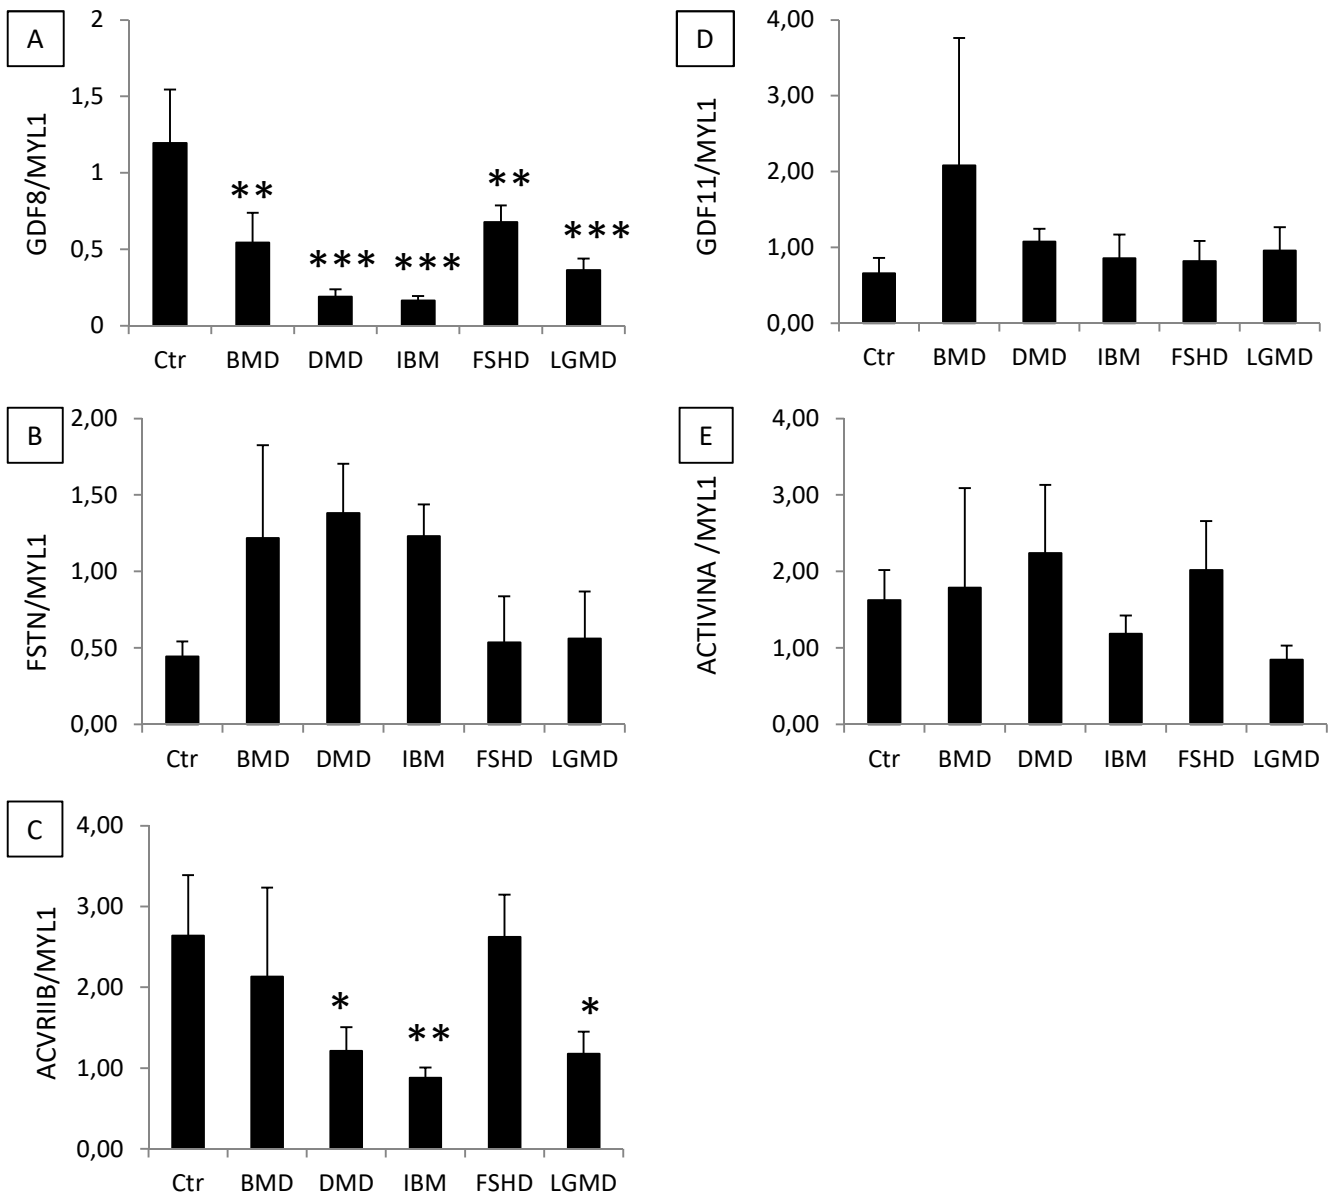

**Supplementary figure 2:** mRNA levels of either *MSTN* (A), *FSTN* (B), *ACVR1B* (C), *GDF11* (D) and *ACTIVIN A* (E) were measured by RT-qPCR and normalized by the expression of the MLC-3fast myosin heavy chain (*MYL1*), in healthy controls (Ctrl, N=9), BMD (N=6), DMD (N=17), IBM (N=17), FSHD (N=13) and LGMD (N=11) patients. All graphs represent mean  $\pm$  SD. A one-way ANOVA, followed by the Fisher's Least Significant Difference multiple comparison test was performed.  $p < 0.05$ ; \*\* $<0.01$ ; \*\*\* $<0.001$

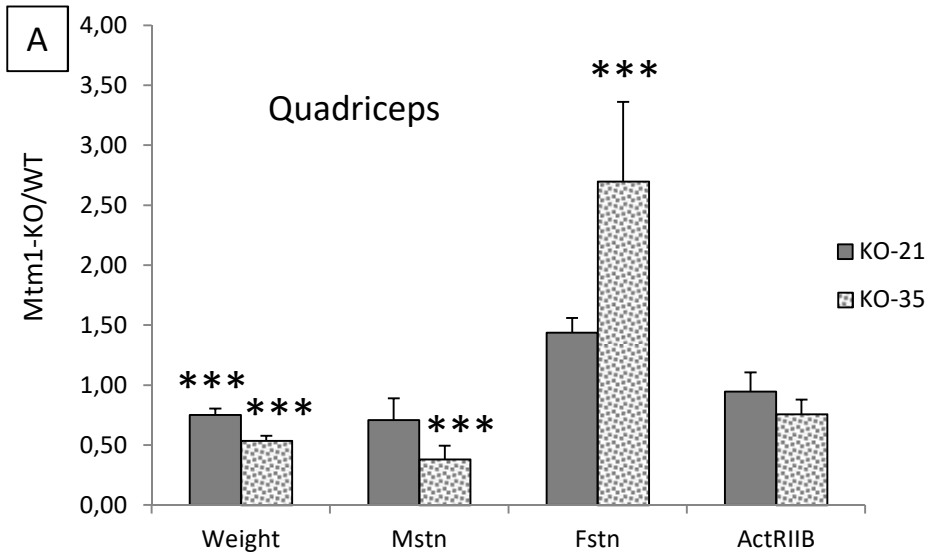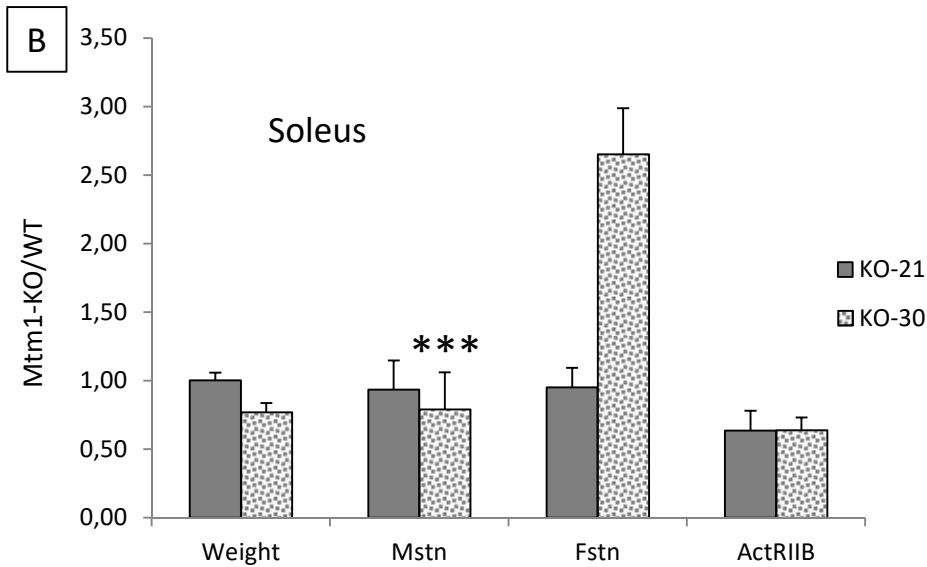

**Supplementary figure 3:** weight and mRNA levels of either *Mstn*, *Fstn*, *Acvr11b* were measured by RT-qPCR in the quadriceps (A) or the soleus (B) of either 21, 30 or 25 day old Mtm1-KO mice. n, number of mice used for each analysis: for the quadriceps, n = 9 and 8 at day 21, 8 and 8 at day 35 for WT and KO-Mtm1 mice respectively; for the soleus, n = 8 and 7 at day 21, 9 and 9 at day 35 for WT and KO-Mtm1 mice respectively. All graphs represent mean  $\pm$  SD. A one-way ANOVA, followed by the Fisher's Least Significant Difference multiple comparison test was performed. p \* < 0.05; \*\* < 0.01; \*\*\* < 0.001

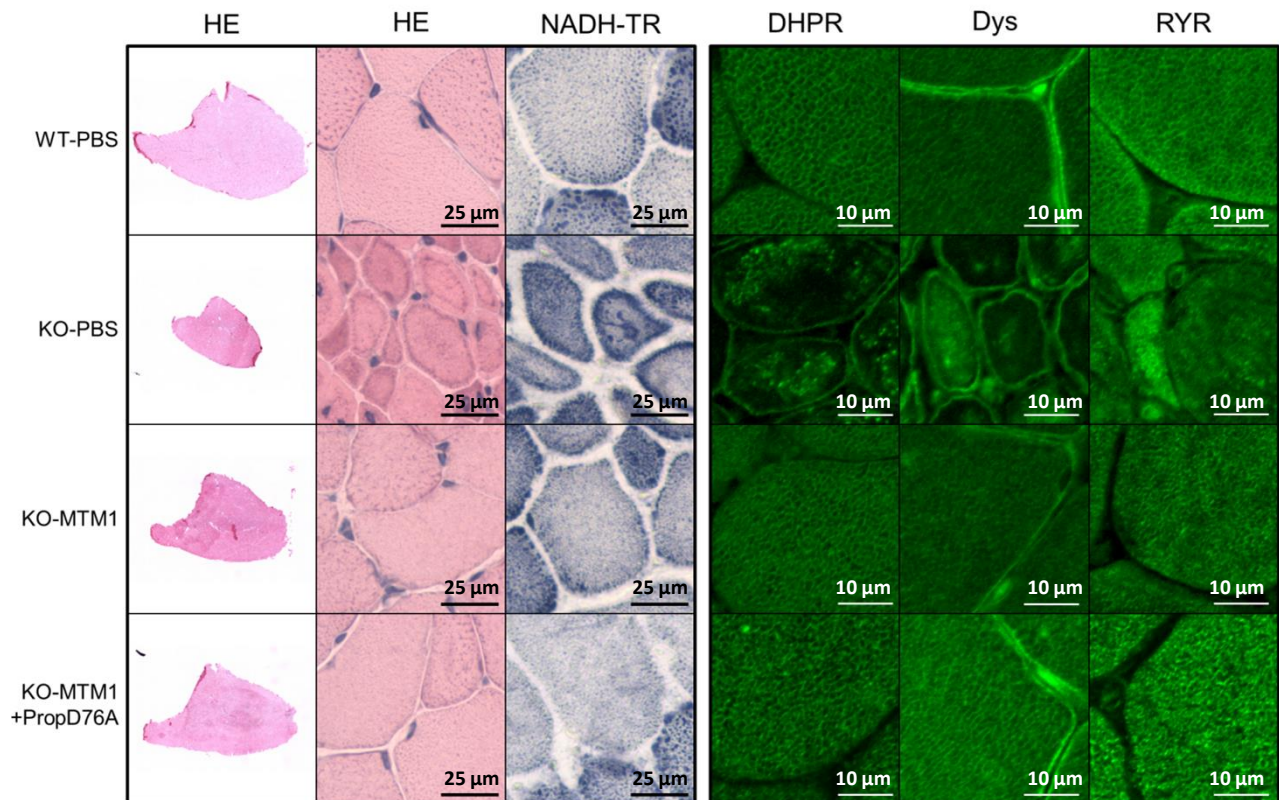

**Supplementary figure 4:** Effect of Mtm1-rescue and mSeAP-PropD76A co-injection on muscle morphological features after 2 weeks of rAAV transduction in the Tibialis anterior (TA) in knockout mouse model. Histological aspect of PBS-treated WT and KO muscle and after injection of a rAAV2/1-Des-Mtm1 and rAAV2/1-CMV-mSeAP-PropD76A. Muscular fiber of TA cross-sections were stained on left panel with hematoxilin and eosin (HE) (magnification  $\times 40$  and  $\times 100$ ), mitochondria and endoplasmic reticulum were stained with nicotimanide adenine dinucleotide tetrazolium reductase (NADH-TR) (magnification  $\times 100$ ), and on right panel dihydropyridine receptor (DHPR), dysferlin (Dys) and ryanodine receptor (RYR) were detected by immunofluorescence (magnification  $\times 1200$ ).
